# Supplementary material for: Copper and Iron Cooperation on Micro-Spherical Silica during Methanol Synthesis via CO2 Hydrogenation
Source: MDPI journal article supplement (doi:10.3390/catal12060603), 2022-05-31
Supplement: s1 [file s1]

Supplementary Material

# Copper and Iron Cooperation on Micro-Spherical Silica during Methanol Synthesis via CO<sub>2</sub> Hydrogenation

S. Todaro<sup>1</sup>, F. Frusteri<sup>1</sup>, D. Wawrzyńczak<sup>2</sup>, I. Majchrzak-Kucęba<sup>2</sup>, J.F. Pérez-Robles<sup>3</sup>, C. Cannilla<sup>1</sup> and G. Bonura<sup>1,\*</sup>

<sup>1</sup> CNR-ITAE, Istituto di Tecnologie Avanzate per l'Energia "Nicola Giordano", via S. Lucia Sopra Contesse, 5, Messina 98126, Italy

<sup>2</sup> Częstochowa University of Technology, Department of Advanced Energy Technologies, Dąbrowskiego 73 St., 42-201, Częstochowa, Poland

<sup>3</sup> Laboratorio de Materiales Nanoestructurados y Caracterización Electroquímica, Cinvestav Libramiento Norponiente, #2000, Fracc. Real de Juriquilla, 76230 Santiago de Querétaro, Qro, Mexico

\* Correspondence: Dr. Giuseppe Bonura. Email address: giuseppe.bonura@itae.cnr.it

**Citation:** Todaro, S.; Frusteri, F.; Wawrzyńczak, D.; Majchrzak-Kucęba, I.; Pérez-Robles, J.-F.; Cannilla, C.; Bonura, G. Copper and Iron Cooperation on Micro-Spherical Silica during Methanol Synthesis via CO<sub>2</sub> Hydrogenation. *Catalysts* **2022**, *12*, 603. <https://doi.org/10.3390/catal12060603>

Academic Editors: Consuelo Alvarez-Galvan and Hamidreza Arandiyan

Received: 4 May 2022

Accepted: 31 May 2022

Published: 31 May 2022

**Publisher's Note:** MDPI stays neutral with regard to jurisdictional claims in published maps and institutional affiliations.

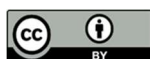

**Copyright:** © 2022 by the authors. Submitted for possible open access publication under the terms and conditions of the Creative Commons Attribution (CC BY) license (<https://creativecommons.org/licenses/by/4.0/>).

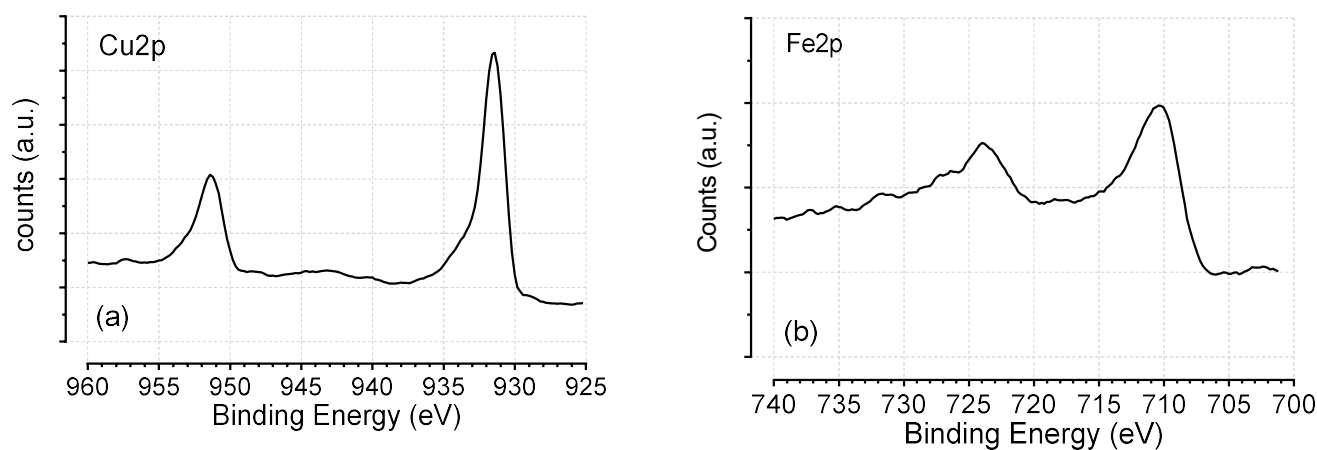

**Figure S1.** Cu2p XPS (a) and Fe2p XPS (b) spectra for the Cu(10)-Si and Fe(10)-Si samples respectively.

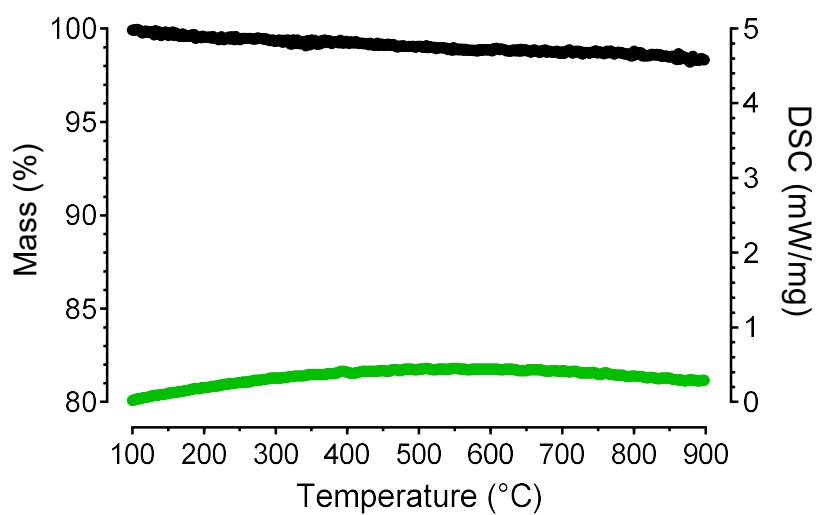

**Figure S2.** TG-DSC analysis on the Cu(3)Fe(7)-Si sample after the stability test ( $P_R$ , 30 bar;  $T_R$ , 260 °C; GHSV: 8800 NL/kg<sub>cat</sub>/h; tos, 5400 min).
